1     **Towards sustainable bioplastic production in resource limited environments using the**  
2     **photoferroautotrophic and photoelectroautotrophic bacterium *Rhodopseudomonas***  
3                                    *palustris* TIE-1

4  
5     Tahina Onina Ranaivoarisoa, Karthikeyan Rengasamy, Michael S. Guzman, Rajesh Singh, and  
6                                    Arpita Bose\*

7  
8     *Department of Biology, Washington University in St. Louis, One Brookings Drive, St. Louis,*  
9                                    *63130*

10

11                                    \*Corresponding author: Arpita Bose

12                                    Department of Biology, Washington University in St. Louis,

13                                    One Brookings Drive, St. Louis, 63130

14                                    Email: [abose@wustl.edu](mailto:abose@wustl.edu)

15                                    Phone: (314) 935-6236

16                                    Fax: (314) 935-4432

17

18

19     Keywords:    Polyhydroxybutyrate,    *Rhodopseudomonas*    *palustris*    TIE-1,    PHB,  
20     Photoferroautotrophy, Photoelectroautotrophy, Iron oxidation

21

## 22 ABSTRACT

23 Bioplastics are an attractive alternative to petroleum-derived plastics because of the harmful  
24 environmental effects of conventional plastics and the impending fossil fuel crisis.  
25 Polyhydroxybutyrate (PHB) is a well-known bioplastic that is produced by several microbes using  
26 organic carbon sources. Autotrophic (using carbon dioxide or CO<sub>2</sub>) PHB production is reported  
27 for only a few organisms. Sustainable PHB bioproduction using other autotrophic microbes needs  
28 to be explored. *Rhodopseudomonas palustris*, a metabolically versatile purple non-sulfur  
29 bacterium (PNSB) is known to produce PHBs under photoheterotrophic conditions.  
30 *Rhodopseudomonas palustris* strain TIE-1 demonstrates extended metabolic versatility by using  
31 electron sources such as ferrous iron and poised electrodes for photoautotrophy. Here we report  
32 the ability of TIE-1 to produce PHB under photoferroautotrophic (light - energy source, ferrous  
33 iron - electron source and CO<sub>2</sub> - carbon source) and photoelectroautotrophic (light - energy source,  
34 poised electrodes - electron source and CO<sub>2</sub> - carbon source) growth conditions. PHB  
35 accumulation was observed both under nitrogen (N<sub>2</sub>) fixing and non-N<sub>2</sub> fixing conditions. For  
36 comparison, we determined PHB production under chemoheterotrophic, photoheterotrophic and  
37 photoautotrophic conditions using hydrogen as the electron donor. Photoferroautotrophic and  
38 photoelectroautotrophic PHB production was on par with that observed from organic carbon  
39 substrates such as butyrate. PHB production increased during N<sub>2</sub> fixation under photoheterotrophic  
40 conditions but not during photoautotrophic growth. Electron microscopy confirmed that TIE-1  
41 cells accumulate PHBs internally under the conditions that showed highest production. However,  
42 gene expression analysis suggests that PHB cycle genes are not differentially regulated despite  
43 observable changes in biopolymer production.

44

45 **IMPORTANCE**

46 PHB bioproduction was reported nearly a century ago. Despite its remarkable properties, PHB's  
47 market competitiveness is affected by high production costs. Use of waste products such as  
48 molasses and industrial food waste for microbial PHB production can lower costs. An alternative  
49 cost-effective strategy is to employ microbes that use abundant and renewable resources. Toward  
50 that end, we report the ability of *Rhodospseudomonas palustris* TIE-1 to produce PHB under  
51 various growth conditions including photoferroautotrophy and photoelectroautotrophy. Because  
52 of the abundance of iron, CO<sub>2</sub> and light on Earth, photoferroautotrophy is a sustainable, carbon  
53 neutral and low-cost strategy for PHB production. Photoelectroautotrophic PHB production can  
54 also be a useful approach in areas that produce electricity sustainably. Overall, our observations  
55 open new doors for sustainable bioplastic production not only in resource-limited environments  
56 on Earth, but also during space exploration and for *in situ* resource utilization (ISRU) on other  
57 planets.

58 Polyhydroxybutyrate (PHB), a member of the polyhydroxyalkanoate (PHA) family is the  
59 most common and well-studied biopolymer produced by bacteria (1). PHB is a potent substitute  
60 for conventional petroleum-based plastics because of many desirable properties. These include  
61 thermoresistance, moldability and biodegradability (2). PHB is also useful in many medical  
62 applications such as drug delivery, reconstructive surgery and bone tissue scaffolding (3).  
63 However, PHB production is currently not cost-effective (4). In order to reduce production costs,  
64 researchers have used many different carbon sources, which fall into two categories: 1) food wastes  
65 including sugar beet, soy and palm oil molasses or 2) cheap pure substrates as feedstock for PHB  
66 bioproduction. In some cases, less cost-effective substrates such as glucose that compete as food  
67 sources have also been tested for PHB production (1).

68 Autotrophic PHB production has been demonstrated by only a handful of organisms and  
69 remains an underexplored strategy for sustainable and carbon neutral bioplastic production. As  
70 carbon dioxide (CO<sub>2</sub>) concentrations rise in our atmosphere, such bioproduction strategies need to  
71 be explored further. The chemoautotrophs that produce PHBs include *Ideonella* sp., and  
72 *Cupriavidus necator* (*Ralstonia eutropha*) (5). Photoautotrophs represent an even more attractive  
73 group of organisms for PHB bioproduction due to their ability to use solar energy for biosynthesis.  
74 To this end, researchers have shown that cyanobacteria can produce PHB while performing  
75 oxygenic photoautotrophy (6). Anoxygenic phototrophic bacteria expand the repertoire of electron  
76 donors that can be used for such bioproduction. Several research groups have reported that PNSB  
77 can produce PHBs during photoheterotrophic growth (7, 8, 9). *Rhodospseudomonas palustris* is a  
78 biotechnologically important PNSB that can produce hydrogen under various growth conditions.  
79 This ability has sparked research on *R. palustris* strains to understand how PHB biosynthesis  
80 influences biohydrogen production (10, 11). To the best of our knowledge, PHB bioproduction

81 under photoautotrophic conditions using inorganic electron donors has not been explored  
82 systematically in PNSB (5, 12).

83 To fill this knowledge gap, here we investigated the ability of the photoautotrophic PNSB  
84 *Rhodospseudomonas palustris* TIE-1 to accumulate PHB. We chose TIE-1 because it demonstrates  
85 extraordinary metabolic versatility even when compared to other *R. palustris* strains. For instance,  
86 similar to other *R. palustris* strains TIE-1 can grow chemoheterotrophically in rich medium and  
87 photoheterotrophically using many different organic carbon sources (13). It can use many different  
88 inorganic electron donors for photoautotrophic growth; some inorganic electron donors such as  
89 hydrogen and thiosulfate are similar to those also used by other *R. palustris* strains; other inorganic  
90 electron donors such as ferrous iron and poised electrodes are unique to TIE-1 (13, 14). Like other  
91 *R. palustris* strains, TIE-1 can also fix N<sub>2</sub> gas (13). Importantly, TIE-1 is the only genetically  
92 tractable photoferroautotroph and photoelectroautotroph available (13, 14). Together, these  
93 abilities make TIE-1 an ideal candidate for testing photoautotrophic PHB production using unique  
94 inorganic electron donors.

95 To investigate the production of PHB by TIE-1, the strain was grown under various  
96 conditions. These include aerobic chemoheterotrophic growth on yeast extract-peptone (YP); and  
97 photoheterotrophic growth (anaerobic) using different carbon sources under both non-nitrogen  
98 (N<sub>2</sub>) and N<sub>2</sub>-fixing conditions. Aerobic growth on YP had the longest generation time compared  
99 to photoheterotrophic growth (Supplementary Table S3). Interestingly, YP grown cells produced  
100 the highest amount of PHB (13.94 g/L) amongst all non-N<sub>2</sub> fixing heterotrophic conditions tested  
101 (Supplementary Table S3 and Figure 1 Panel A (a and b)). TIE-1 produced the lowest amount of  
102 PHB (1.76 g/L) on succinate under non-N<sub>2</sub> fixing conditions. PHB production varied from 2.22  
103 g/L to 3.19 g/L when cells were grown in acetate, butyrate and 3-hydroxybutyrate (Supplementary

104 Table S3 and Figure 1 Panel Ab). These low PHB levels might be linked to the availability of fixed  
105 nitrogen and an abundant carbon source, which could cause TIE-1 to increase cell numbers but not  
106 accumulate PHB as a carbon reserve. We examined PHB production under N<sub>2</sub> fixing conditions.  
107 In general, N<sub>2</sub> fixation delayed cell growth and resulted in a longer lag phase (approximately 2  
108 times higher) when compared to growth under non-N<sub>2</sub> fixing conditions. We also observed an  
109 increase in the maximum optical density (OD<sub>660</sub>) under N<sub>2</sub>-fixing photoheterotrophic growth  
110 conditions with acetate and butyrate whereas no significant difference was observed with succinate  
111 and 3-hydroxybutyrate (Supplementary Table S3). PHB accumulation increased on all N<sub>2</sub>-fixing  
112 photoheterotrophic conditions tested. PHB production doubled when cells were grown on 3-  
113 hydroxybutyrate (8.02 g/L), tripled on succinate (3.66 g/L), quadrupled on acetate (8.34 g/L), and  
114 increased 10-fold (23.12 g/L) on butyrate (Supplementary Table S3 and Figure 1 Panel Ab).

115 We also examined PHB production under photoautotrophic growth conditions using three  
116 different electron donors: hydrogen (H<sub>2</sub>), ferrous iron (photoferroautotrophy) and a poised graphite  
117 electrode (photoelectroautotrophy). TIE-1 was adapted to photoautotrophic growth using H<sub>2</sub> in the  
118 presence or absence of fixed nitrogen. Under N<sub>2</sub> fixing conditions, we observed that PHB  
119 production was as high as that observed during aerobic growth on YP (Figure 1 Panel Ac and  
120 Supplementary Table S3). Using H<sub>2</sub>, TIE-1 produced 11.69 g/L PHB under N<sub>2</sub> fixing conditions  
121 and 8.4 g/L under non-N<sub>2</sub> fixing conditions (Figure 1 Panel Ac and Supplementary Table S3).  
122 Growth on H<sub>2</sub> under non-N<sub>2</sub> fixing conditions was found to favor a higher maximal optical density  
123 (OD<sub>660</sub> = 1.16) and a shorter generation time ( $\mu = 34$  hours) when compared to N<sub>2</sub> fixing conditions  
124 (OD<sub>660</sub> = 0.54,  $\mu = 41$  hours) (Supplementary Table S3). Photoferroautotrophic growth under non-  
125 N<sub>2</sub> fixing conditions supported higher PHB production levels than those observed under YP  
126 growth, and close to those observed under the most productive photoheterotrophic condition (i.e.

127 butyrate under non-N<sub>2</sub> fixing conditions) (Figure 1 Panel Ac). The presence of PHB intracellular  
128 granules was confirmed by scanning transmission electron microscopy-electron energy loss  
129 spectroscopy (STEM-EELS) (Figure 2, Panel B). Under photoelectroautotrophic conditions the  
130 generation time did not change significantly under N<sub>2</sub> fixing ( $g = 82$  hours) vs non-N<sub>2</sub> fixing  
131 conditions ( $g = 76$  hours). TIE-1 grown in an open circuit reactor (electrode not passing current)  
132 did not show any growth under N<sub>2</sub>-fixing or non- N<sub>2</sub> fixing growth conditions (Supplementary  
133 Table S3 and Figure 1 Panel Ca). After 96 hours of growth, the electron uptake was almost half  
134 under N<sub>2</sub> fixing ( $0.93 \mu\text{A}/\text{cm}^2$ ) compared to non-N<sub>2</sub> fixing conditions ( $1.92 \mu\text{A}/\text{cm}^2$ ) (Figure 1  
135 Panel Cb and Supplementary Table S4). Slightly lower maximum planktonic OD<sub>660</sub> was obtained  
136 under N<sub>2</sub>-fixing conditions compared to growth with fixed N<sub>2</sub>. The PHB concentration was 9.1 g/L  
137 under N<sub>2</sub> fixing conditions and 9.6 g/L under non-N<sub>2</sub> fixing conditions (Figure 1 Panel Ac, Panel  
138 Cb and Supplementary Table S3). When grown in an open circuit reactor, no PHB accumulation  
139 was detected (Supplementary Table S3) suggesting that PHB was used for cellular maintenance in  
140 the absence of an electron donor. In addition to carbon storage, PHB is suggested to act as an  
141 electron sink for bacteria especially under N<sub>2</sub> fixing conditions (15). During photoferroautotrophic  
142 and photoelectroautotrophic growth, TIE-1 cells might be highly reduced. Under these conditions  
143 PHB biosynthesis could provide an electron sink, thus explaining the high level of PHB  
144 accumulation. McKinlay *et al.* have suggested a similar role for PHB synthesis in *R. palustris*  
145 CGA009 when it is grown under N<sub>2</sub> deplete conditions with acetate (11).

146 To determine whether the expression of the genes involved in PHB biosynthesis and  
147 degradation change with changes in PHB levels, we performed transcriptomic analysis using  
148 RNA-Seq, and reverse transcription quantitative PCR (RT-qPCR). The genes include those  
149 encoding the first enzyme  $\beta$ -ketothiolase (acetyl-CoA acetyltransferase - PhaA that condenses two

150 acetyl CoA molecules into acetoacetyl CoA; the second enzyme, an acetoacetyl CoA reductase that  
151 catalyzes the formation of the 3-hydroxybutyrate monomer from acetoacetyl CoA (PhaB); and  
152 finally, the polymerase (PhaC) that synthesizes the polymer PHB. When bacteria mobilize PHB,  
153 depolymerization of the granules is performed by the PHB depolymerase (PhaZ). The genes  
154 involved in the PHB biosynthesis pathway are well characterized in the PHB-producing model  
155 bacterium *Ralstonia eutropha* (16, 17, 18). The potential roles of the TIE-1 homologs are  
156 summarized in a simplified PHB cycle depicted in Supplementary Figure 1. Similar to *R. eutropha*  
157 (19), and *Bradyrhizobium japonicum* (20), there are multiple isozymes for the PhaA and PhaC  
158 enzymes, respectively, in TIE-1. In *Bradyrhizobium diazoefficiens*, an organism closely related  
159 to *R. palustris*, PhaR regulates PHB biosynthesis by repressing the expression of *phaC*<sub>1</sub> and *phaC*<sub>2</sub>.  
160 In addition, PhaR regulates PhaP, a protein that binds to the surface and controls the number and  
161 size of the PHB granules. PhaR also binds to PHB granules during PHB synthesis and dissociates  
162 from it as the granule size grows (21). RNA-Seq analysis showed that the genes identified in the  
163 PHB cycle are not differentially regulated with respect to growth conditions or levels of PHB  
164 (Supplementary Table S5, S6 and S7). RT-qPCR analysis was performed on the *phaA* isozyme  
165 (Rpal\_0532) that showed highest expression. Next to this *phaA* gene is a *phaB* isozyme gene with  
166 the locus tag Rpal\_0533 (Supplemental Figure S1b, and Supplementary Table S8). The fact that  
167 these two genes appeared to be part of an operon supported our selection (Supplemental Figure  
168 S1b). Moreover, the gene for *phaR* (Rpal\_0531) is next to the *phaA* (Rpal\_0532) gene but  
169 expressed from the opposite strand. RT-qPCR corroborated the RNA-Seq data, which together  
170 show that the expression of the genes in the PHB cycle does not change under different growth  
171 conditions (Figure 2 Panel Aa-b). McKinlay *et al.* reported similar results when *R. palustris* CG009  
172 was grown photoheterotrophically on acetate, under N<sub>2</sub> deprivation (11). They observed that



173 although PHB accumulated under these conditions, no change in PHB biosynthesis genes was  
174 notable (11).

175

## 176 **Implications**

177 Here, we report PHB production by *R. palustris* TIE-1 under chemoheterotrophic (in YP);  
178 photoheterotrophic (using organic carbon sources: succinate, acetate, butyrate or 3-  
179 hydroxybutyrate); and photoautotrophic (using hydrogen, ferrous iron or poised electrodes as  
180 electron donor) conditions. Photoheterotrophic growth under N<sub>2</sub> fixing conditions yielded higher  
181 PHB. The highest PHB production was obtained from photoheterotrophic growth on butyrate  
182 under N<sub>2</sub> fixing conditions (23.12 g/L). This production is just 2-fold lower than the chemotrophic  
183 organism, *Cupriavidus necator* NCIMB 11599 (41.5 g/L) when it's grown with a wheat based rich  
184 medium under nitrogen limited conditions (12). When compared to other autotrophs, the ability  
185 of TIE-1 to produce PHB under various heterotrophic, chemotrophic and phototrophic conditions  
186 offers a clear advantage in areas either depleted in organic carbon and/or having waste products as  
187 the most available carbon. In addition to its ability to produce PHB under heterotrophic conditions,  
188 TIE-1 can produce PHBs under unique photoautotrophic growth condition using H<sub>2</sub>, ferrous iron  
189 or poised electrodes as electron source. Furthermore, TIE-1 has the ability to fix atmospheric N<sub>2</sub>  
190 which allows it to produce PHBs in the complete absence of available fixed nitrogen. We observed  
191 that anoxygenic photoautotrophic PHB production using abundant and accessible electron donors,  
192 such as ferrous iron, was higher than production under chemoheterotrophic growth in rich media.

193 Our results expand the substrate range that can be used by microbes for PHB production.

194 TIE-1's unique metabolic abilities such as photoferroautotrophy and photoelectroautotrophy can

195 be used in novel sustainable PHB bioproduction platforms. Iron is the fourth most abundant  
196 element on Earth, and by using iron with solar energy, TIE-1 can be used to produce biochemicals  
197 such as PHB while capturing the potent and abundant greenhouse gas, CO<sub>2</sub> (22, 23). Such a  
198 strategy will be especially valuable in resource-limited environments on Earth. Electricity can be  
199 produced renewably using solar and wind energy in many parts of our planet (24). In combination  
200 with solar energy and CO<sub>2</sub>, TIE-1 can be used to produce PHB using renewable electricity.  
201 Because TIE-1 can produce PHBs using many organic carbon sources, the use of waste materials  
202 as substrates is conceivable. Thus, TIE-1 represents a very metabolically versatile microbe that  
203 should be explored further for biochemical production not only on Earth but also during space  
204 exploration, and for *in situ* resource utilization (ISRU) on planets like Mars rich in iron, sunlight,  
205 carbon dioxide and nitrogen (25). TIE-1 based bioproduction strategies should be also be  
206 considered for waste management on Earth and “in flight” and “post arrival” during space  
207 exploration.

208

209 **Accession number(s)**

210 All RNA sequence reads have been deposited with NCBI under BioProject accession  
211 number PRJNA417278.

212 **Acknowledgements**

213 We are grateful to Josh Blodgett and Yifei Hu for their support during PHB analysis using LC-  
214 MS. We appreciate funding provided by The David and Lucile Packard Foundation as well as the  
215 Department of Energy (grant number DESC0014613).

216

217

218

219

220

221

222

223

224

225

226

227

228

229

230

231 **References**

- 232 1. **Verlinden RA, Hill DJ, Kenward MA, Williams CD, Radecka I.** 2007. Bacterial  
233 synthesis of biodegradable polyhydroxyalkanoates. *J. Appl. Microbiol.* **102**:1437-49.
- 234 2. **Chen G-Q.** 2010. *Plastics from bacteria: natural functions and applications.* Springer,  
235 Heidelberg; New York.
- 236 3. **Manavitehrani I, Fathi A, Badr H, Daly S, Negahi Shirazi A, Dehghani F.** 2016.  
237 Biomedical applications of biodegradable polyesters. *Polymers* **8**:20.
- 238 4. **Sabbagh F, Muhamad II.** 2017. Production of poly-hydroxyalkanoate as secondary  
239 metabolite with main focus on sustainable energy. *Renew. Sus. Energ. Rev.* **72**:95-104.
- 240 5. **Khosravi-Darani K, Mokhtari Z-B, Amai T, Tanaka K.** 2013. Microbial production of  
241 poly(hydroxybutyrate) from C1 carbon sources. *Appl. Microbiol. Biotechnol.* **97**:1407–  
242 1424.
- 243 6. **Troschl C, Meixner K, Drosch B.** 2017. Cyanobacterial PHA Production-Review of  
244 Recent Advances and a Summary of Three Years' Working Experience Running a Pilot  
245 Plant. *Bioeng. (Basel)*. **4(2)**:26.
- 246 7. **Mukhopadhyay M, Patra A, Paul AK.** 2005. Production of poly(3-hydroxybutyrate) and  
247 poly(3-hydroxybutyrate-co-3-hydroxyvalerate) by *Rhodospseudomonas palustris* SP5212.  
248 *World J. Microbiol. Biotechnol.* **21(5)**:765–769.
- 249 8. **Mukhopadhyay M, Patra A, Paul AK.** 2013. Phototrophic Growth and Accumulation of  
250 Poly(3-hydroxybutyrate-co-3-hydroxyvalerate) by Purple Nonsulfur Bacterium  
251 *Rhodospseudomonas palustris* SP5212. *J. Polym.* 2013: Article ID 523941.

- 252 9. **Merugu R, Girisham S., Reddy S.M.** 2010. Production of PHB (Polyhydroxybutyrate)  
253 by *Rhodopseudomonas palustris* KU003 under nitrogen limitation. Int. J. Appl. Biol.  
254 Pharm. Technol. **1(2):676-678**
- 255 10. **Wu SC, Liou SZ, Lee CM.** 2012. Correlation between bio-hydrogen production and  
256 polyhydroxybutyrate (PHB) synthesis by *Rhodopseudomonas palustris* WP3-5. Bioresour.  
257 Technol. **113:44-50.**
- 258 11. **McKinlay JB, Oda Y, Ruhl M, Posto AL, Sauer U, Harwood CS.** 2014. Non-growing  
259 *Rhodopseudomonas palustris* increases the hydrogen gas yield from acetate by shifting  
260 from the glyoxylate shunt to the tricarboxylic acid cycle. J. Biol. Chem. **289:1960-70.**
- 261 12. **Pagliano G, Ventrino V, Panico A, Pepe O.** 2017. Integrated systems for biopolymers  
262 and bioenergy production from organic waste and by-products: a review of microbial  
263 processes. Biotechnol. Biofuel. **10:113.**
- 264 13. **Jiao Y, Kappler A, Croal LR, Newman DK.** 2005. Isolation and characterization of a  
265 genetically tractable photoautotrophic Fe(II)-oxidizing bacterium, *Rhodopseudomonas*  
266 *palustris* strain TIE-1. Appl. Env. Microbiol. **71:4487-96.**
- 267 14. **Bose A, Gardel EJ, Vidoudez C, Parra EA, Girguis PR.** 2014. Electron uptake by iron-  
268 oxidizing phototrophic bacteria. Nat. Commun. **5:3391.**
- 269 15. **Dawes EA.** 1988. Polyhydroxybutyrate: an intriguing biopolymer. Biosci. Rep. **8:537-47.**
- 270 16. **Peoples OP, Sinskey AJ.** 1989. Poly-beta-hydroxybutyrate biosynthesis in *Alcaligenes*  
271 *eutrophus* H16. Characterization of the genes encoding beta-ketothiolase and acetoacetyl-  
272 CoA reductase. J. Biol. Chem. **264:15293-7.**

- 273 17. **Peoples OP, Sinskey AJ.** 1989. Poly-beta-hydroxybutyrate (PHB) biosynthesis in  
274 *Alcaligenes eutrophus* H16. Identification and characterization of the PHB polymerase  
275 gene (phbC). *J. Biol. Chem.* **264**:15298-303.
- 276 18. **Uchino K, Saito T, Jendrossek D.** 2008. Poly(3-hydroxybutyrate) (PHB) depolymerase  
277 PhaZa1 is involved in mobilization of accumulated PHB in *Ralstonia eutropha* H16. *Appl.*  
278 *Env. Microbiol.* **74**:1058-1063.
- 279 19. **Slater S, Houmiel KL, Tran M, Mitsky TA, Taylor NB, Padgett SR, Gruys KJ.** 1998.  
280 Multiple beta-ketothiolases mediate poly(beta-hydroxyalkanoate) copolymer synthesis in  
281 *Ralstonia eutropha*. *J. Bacteriol.* **180**:1979-87.
- 282 20. **Quelas JI, Mongiardini EJ, Perez-Gimenez J, Parisi G, Lodeiro AR.** 2013. Analysis of  
283 Two Polyhydroxyalkanoate Synthases in *Bradyrhizobium japonicum* USDA 110. *J.*  
284 *Bacteriol.* **195**:3145-3155.
- 285 21. **Quelas JI, Mesa S, Mongiardini EJ, Jendrossek D, Lodeiro AR.** 2016. Regulation of  
286 Polyhydroxybutyrate Synthesis in the Soil Bacterium *Bradyrhizobium diazoefficiens*.  
287 *Appl. Env. Microbiol.* **82**:4299-4308.
- 288 22. **Greenwood NN, Earnshaw A.** 1984. Chemistry of the elements. Pergamon Press, Oxford.
- 289 23. **Parida B, Iniyam S, Goic R.** 2011. A review of solar photovoltaic technologies. *Renew.*  
290 *Sus. Energ. Rev.* **15**:1625-1636.
- 291 24. [https://www.scientificamerican.com/article/u-s-reports-a-major-milestone-in-wind-and-](https://www.scientificamerican.com/article/u-s-reports-a-major-milestone-in-wind-and-solar-power/)  
292 [solar-power/](https://www.scientificamerican.com/article/u-s-reports-a-major-milestone-in-wind-and-solar-power/)
- 293 25. **Menezes AA, Cumbers J, Hogan JA, Arkin AP.** 2015. Towards synthetic biological  
294 approaches to resource utilization on space missions. *J. R. Soc. Interface* **12**:102.

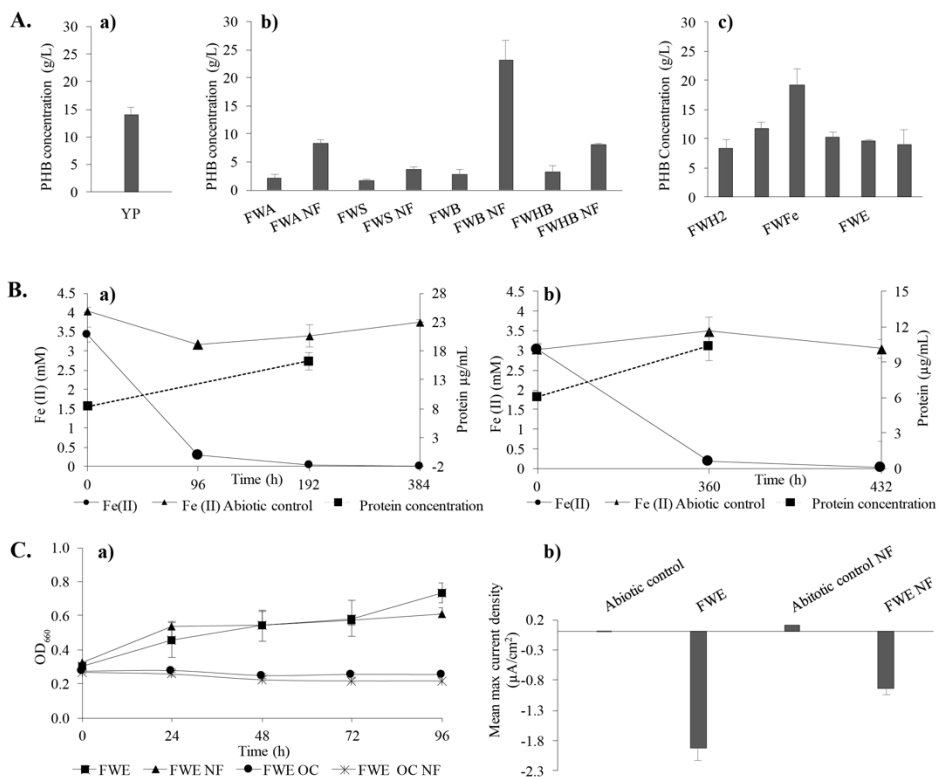

**Figure 1. PHB production by TIE-1. Panel A. (a)** Under chemoheterotrophy in YP; **(b)** Under anaerobic photoheterotrophic conditions with ammonium chloride (NH<sub>4</sub>Cl) or under nitrogen fixing conditions (NF). Cells were grown with Fresh Water (FW) media supplemented with 10 mM succinate (FWS), acetate (FWA), butyrate (FWB) or hydroxybutyrate (FWHB). Cells were grown to late exponential phase: OD<sub>660</sub>~0.7; **(c)** Under anaerobic photoautotrophic conditions in H<sub>2</sub>CO<sub>2</sub> (FWH2) grown to an of OD<sub>660</sub>~0.7, in 5 mM Iron (II) chloride (FWFe) for 8 days of growth with NH<sub>4</sub>Cl, 15 days of growth under nitrogen fixing condition (FWFe NF) and photoelectroautotrophy with NH<sub>4</sub>Cl (FWE), and for 4 days under nitrogen fixing conditions (FWE NF) (n=3 biological replicates). **Panel B.** Iron (II) oxidation and protein concentration during the growth of TIE-1 under photoferroautotrophic growth. Cells were grown in FW media supplemented with 5 mM Iron (II) chloride and NH<sub>4</sub>Cl in panel **(a)**; and under nitrogen fixation condition in panel **(b)**. (n=3 biological replicates). **Panel C. (a)** OD<sub>660</sub> values of the growth of TIE-1 grown under photoelectroautotrophy in FW supplemented with NH<sub>4</sub>Cl (FWE), under nitrogen fixing condition (FWE NF) or when the electrodes are not poised, called open circuit (OC). The two open circuit conditions shown are FWE OC and FWE OC NF; **(b)** Mean maximum current density (µA/cm<sup>2</sup>) (n=3 biological replicates) of FWE, FWE NF conditions, and the abiotic controls.

**A.**

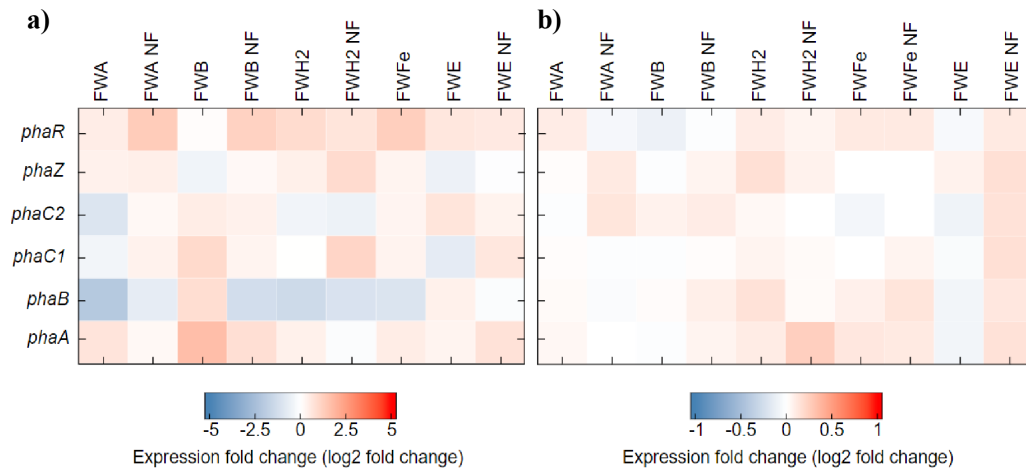

**B.**

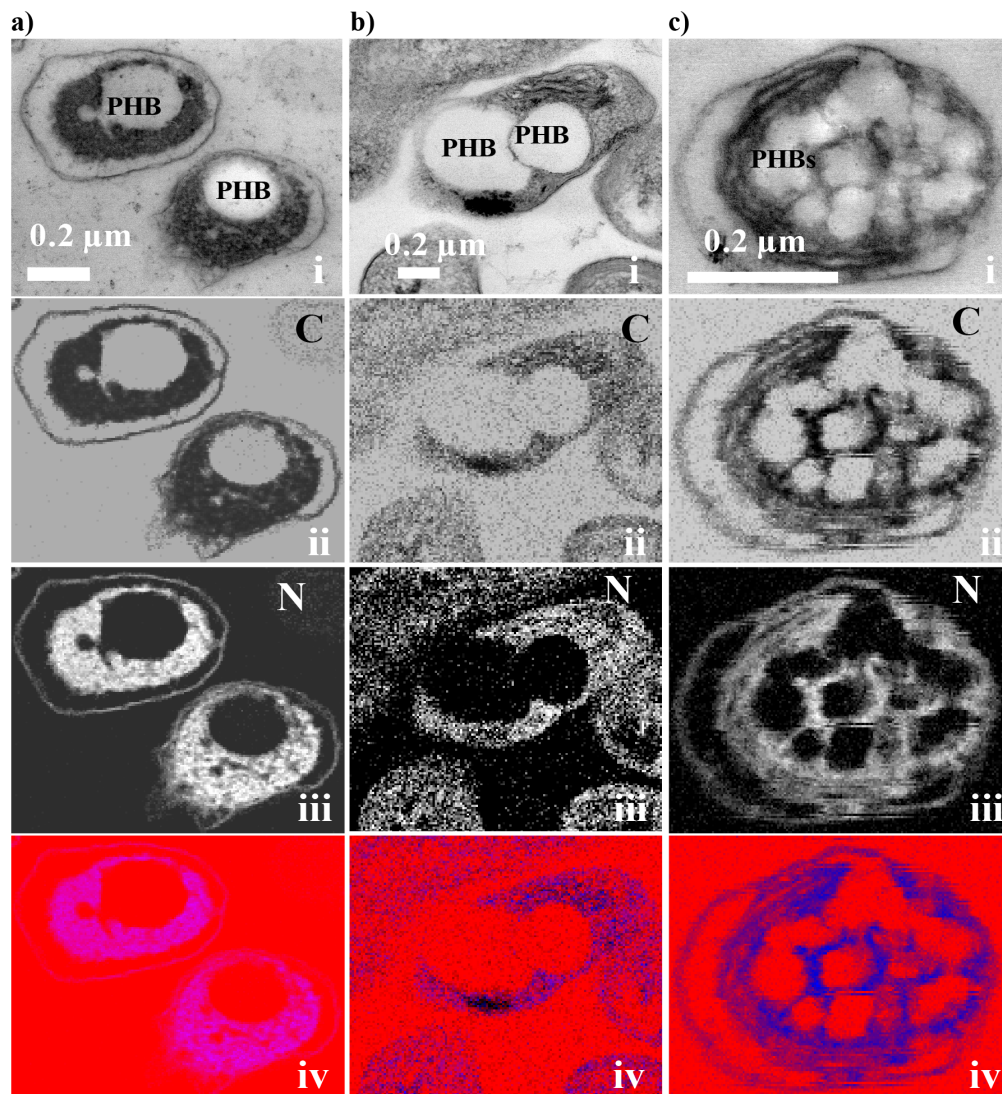



**Figure 2. Panel A.** Heat map showing log<sub>2</sub> fold change in expression of PHB genes. **(a)** from RNA sequencing analysis; **(b)** from RT-qPCR. Results are from different growth conditions as described previously in Fresh Water (FW) media, either photoheterotrophically with succinate (FWS), acetate (FWA), butyrate (FWB), hydroxybutyrate (FWHB), or photoautotrophically with H<sub>2</sub> (FWH<sub>2</sub>), photoferroautotrophically (FWFe), or photoelectroautotrophically (FWE) under N<sub>2</sub>-fixing (NF) or non-N<sub>2</sub> fixing conditions. Results are from n=3 biological replicates. **Panel B.** STEM-EELS images of TIE-1 with PHB granules and corresponding carbon and nitrogen maps grown under FW media photoheterotrophically with butyrate in panel **(a)**; photoferroautotrophically in panel **(b)**; and photoelectroautotrophically in panel **(c)**. Bright areas represent the dominance of the corresponding element. Each panel comprises, (i) TEM bright field image, (ii) a nitrogen map (N) (iii) a carbon map (C) and (iv) a composite image where red represents carbon, blue nitrogen. The carbon background is due to the carbon-based resin that was used for embedding the cells.
